# Supplementary material for: Absorption and Fluorescence Emission Investigations on Supramolecular Assemblies of Tetrakis-(4-sulfonatophenyl)porphyrin and Graphene Quantum Dots
Source: MDPI journal article supplement (doi:10.3390/molecules29092015), 2024-04-27
Supplement: s1 [file s1]

## Supporting Information for

# Absorption and Fluorescence Emission Investigations on Supramolecular Assemblies of Tetrakis-(4-sulfonatophenyl)porphyrin and Graphene Quantum Dots

Mariachiara Sarà,<sup>1</sup> Salvatore Vincenzo Giofrè,<sup>1</sup> Salvatore Abate,<sup>1</sup> Mariachiara Trapani,<sup>2</sup> Rosaria Verduci,<sup>3</sup> Giovanna D'Angelo,<sup>3</sup> Maria Angela Castriciano,<sup>1</sup> Andrea Romeo,<sup>1,2</sup> Giovanni Neri<sup>4</sup> and Luigi Monsù Scolaro<sup>\*1,2</sup>

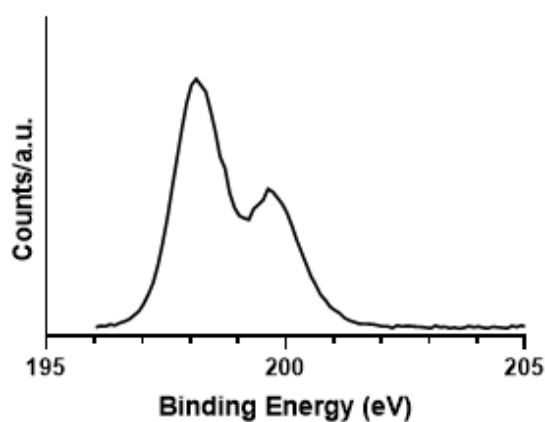

Figure S1. XPS spectra for Cl2p levels region on GQD.

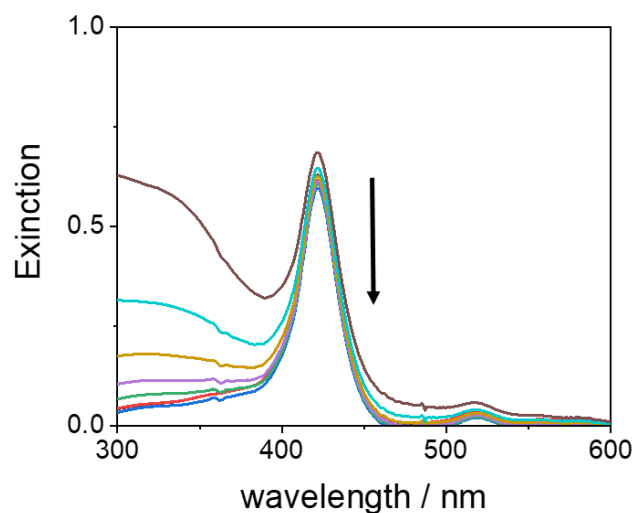

**Figure S2.** UV/Vis extinction spectral changes during the titration of TMPyP(4)<sup>4+</sup> with GQDs at neutral pH (the arrow marks the increasing GQDs concentration). Experimental conditions: [TMPyP(4)<sup>4+</sup>] = 3  $\mu$ M; [GQDs] = 0, 0.002, 0.01, 0.034, 0.056, 0.1, 0.18, 0.40 mg/mL; phosphate buffer 1 mM, pH = 7; T = 298 K; cell path length 1 cm.

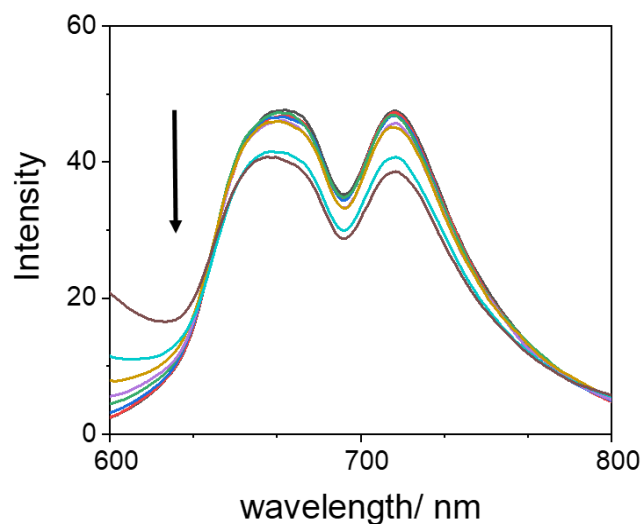

**Figure S3.** Fluorescence emission spectral changes during the titration of TMPyP(4)<sup>4+</sup> with GQDs at neutral pH (the arrow marks the increasing GQDs concentration). The emission spectra are not corrected for the extinction of the samples. Experimental conditions: [TMPyP(4)<sup>4+</sup>] = 3  $\mu$ M; [GQDs] = 0, 0.002, 0.01, 0.034, 0.056, 0.1, 0.18, 0.40 mg/mL; phosphate buffer 1 mM, pH = 7; T = 298 K; cell path length 1 cm.

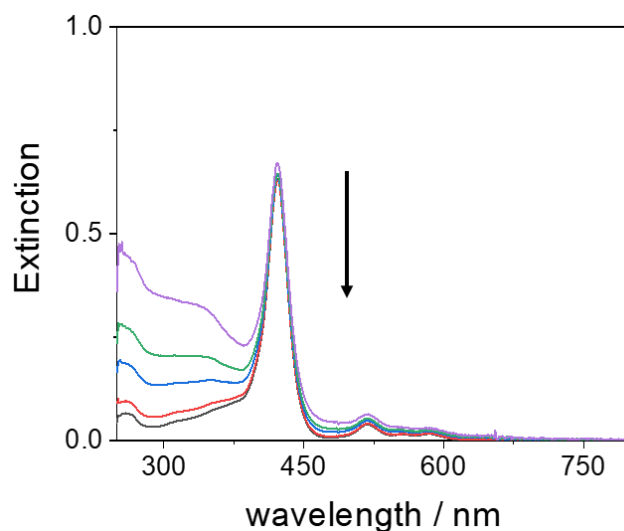

**Figure S4.** UV/Vis extinction spectral changes during the titration of TMPyP(4)<sup>4+</sup> with GQDs at pH = 3 (the arrow marks the increasing GQDs concentration). Experimental conditions: [TMPyP(4)<sup>4+</sup>] = 3  $\mu$ M; [GQDs] = 0, 0.01, 0.056, 0.1, – 0.18 mg/mL; [HCl] = 10<sup>-3</sup> M; T = 298 K; cell path length 1 cm.

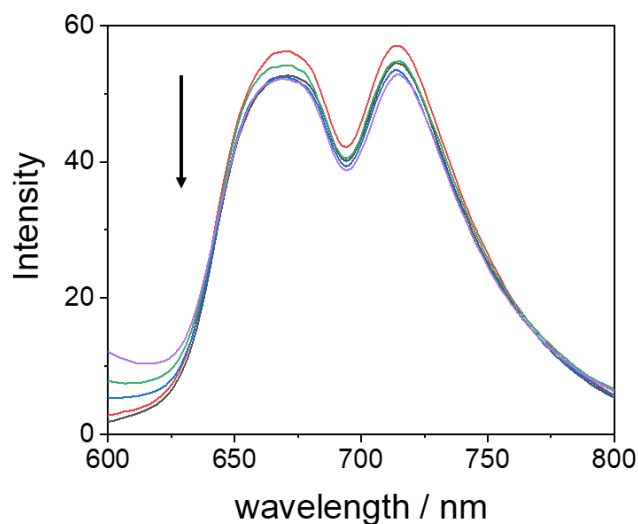

**Figure S5.** Fluorescence emission spectral changes during the titration of TMPyP(4)<sup>4+</sup> with GQDs at pH = 3 (the arrow marks the increasing GQDs concentration). The emission spectra are not corrected for the extinction of the samples. Experimental conditions: [TMPyP(4)<sup>4+</sup>] = 3  $\mu$ M; [GQDs] = 0, 0.01, 0.056, 0.1, – 0.18 mg/mL; [HCl] = 10<sup>-3</sup> M; T = 298 K; cell path length 1 cm.

**Table S1.** Fluorescence lifetimes ( $\tau_1$  and  $\tau_2$ ) and relative percentage amplitudes, together with the time constant of fluorescence anisotropy decays for the titration of TPPS<sub>4</sub><sup>4-</sup> with GQDs at neutral pH. Experimental conditions: [TPPS<sub>4</sub><sup>4-</sup>] = 3  $\mu$ M; phosphate buffer 10 mM, pH = 7; T = 298 K; cell path length 1 cm;  $\lambda_{exc}$  = 390 nm;  $\lambda_{em}$  = 644 nm.

| [GQDs] / mg mL <sup>-1</sup> | Lifetime / ns (relative amplitude) |                              | Anisotropy Decays / ns  |
|------------------------------|------------------------------------|------------------------------|-------------------------|
| 0                            | $\tau_1 = 10.0 \pm 0.1$ (97%)      | $\tau_2 = 1.1 \pm 0.1$ (3%)  | $\tau_r = 0.72 \pm 0.1$ |
| 0.02                         | $\tau_1 = 10.4 \pm 0.1$ (93%)      | $\tau_2 = 1.3 \pm 0.1$ (7%)  | $\tau_r = 0.96 \pm 0.1$ |
| 0.04                         | $\tau_1 = 9.99 \pm 0.1$ (92%)      | $\tau_2 = 1.4 \pm 0.1$ (8%)  | $\tau_r = 1.00 \pm 0.1$ |
| 0.06                         | $\tau_1 = 10.1 \pm 0.1$ (86%)      | $\tau_2 = 1.8 \pm 0.1$ (14%) | $\tau_r = 0.92 \pm 0.1$ |

**Table S2.** Fluorescence lifetimes ( $\tau_1$ ,  $\tau_2$  and  $\tau_3$ ) and relative percentage amplitudes for the titration of GQDs with TPPS<sub>4</sub><sup>4-</sup> at neutral pH. Experimental conditions: [GQDs] = 0.14 mg/mL; phosphate buffer 10 mM, pH = 7; T = 298 K; cell path length 1 cm;  $\lambda_{exc}$  = 390 nm;  $\lambda_{em}$  = 474 nm.

| [TPPS <sub>4</sub> ] / $\mu$ M | Lifetime / ns (relative amplitude) |                              |                              |
|--------------------------------|------------------------------------|------------------------------|------------------------------|
| 0                              | $\tau_1 = 15.4 \pm 0.1$ (14%)      | $\tau_2 = 5.4 \pm 0.1$ (61%) | $\tau_3 = 1.8 \pm 0.1$ (25%) |
| 0.07                           | $\tau_1 = 14.6 \pm 0.1$ (17%)      | $\tau_2 = 5.0 \pm 0.1$ (64%) | $\tau_3 = 1.5 \pm 0.1$ (19%) |
| 0.42                           | $\tau_1 = 14.9 \pm 0.1$ (16%)      | $\tau_2 = 5.2 \pm 0.1$ (72%) | $\tau_3 = 1.6 \pm 0.1$ (22%) |
| 0.90                           | $\tau_1 = 15.5 \pm 0.1$ (15%)      | $\tau_2 = 5.3 \pm 0.1$ (61%) | $\tau_3 = 1.8 \pm 0.1$ (24%) |
| 1.80                           | $\tau_1 = 16.3 \pm 0.1$ (14%)      | $\tau_2 = 5.4 \pm 0.1$ (64%) | $\tau_3 = 1.7 \pm 0.1$ (22%) |
| 3.00                           | $\tau_1 = 16.5 \pm 0.1$ (15%)      | $\tau_2 = 5.6 \pm 0.1$ (63%) | $\tau_3 = 1.9 \pm 0.1$ (22%) |

**Table S3.** Fluorescence lifetimes ( $\tau_1$  and  $\tau_2$ ) and relative percentage amplitudes, together with the time constant of fluorescence anisotropy decays for the titration of TPPS<sub>4</sub><sup>4-</sup> with GQDs at pH = 3. Experimental conditions: [TPPS<sub>4</sub><sup>4-</sup>] = 3  $\mu$ M; pH = 3 ([HCl] = 10<sup>-3</sup> M); T = 298 K; cell path length 1 cm;  $\lambda_{exc}$  = 390 nm;  $\lambda_{em}$  = 670 nm.

| [GQDs] / mg mL <sup>-1</sup> | Lifetime / ns (relative amplitude) |                              | Anisotropy Decays / ns  |
|------------------------------|------------------------------------|------------------------------|-------------------------|
| 0                            | $\tau_1 = 3.9 \pm 0.1$ (92%)       | $\tau_2 = 1.9 \pm 0.1$ (8%)  | $\tau_r = 0.88 \pm 0.1$ |
| 0.02                         | $\tau_1 = 3.8 \pm 0.1$ (90%)       | $\tau_2 = 1.9 \pm 0.1$ (10%) | $\tau_r = 0.99 \pm 0.1$ |
| 0.08                         | $\tau_1 = 3.8 \pm 0.1$ (90%)       | $\tau_2 = 1.9 \pm 0.1$ (10%) | $\tau_r = 1.02 \pm 0.1$ |
| 0.28                         | $\tau_1 = 3.9 \pm 0.1$ (92%)       | $\tau_2 = 1.9 \pm 0.1$ (10%) | $\tau_r = 1.05 \pm 0.1$ |
